# Supplementary material for: Identification of Pan-Cancer Biomarkers Based on the Gene Expression Profiles of Cancer Cell Lines
Source: Front Cell Dev Biol. 2021 Nov 30;9:781285. doi: 10.3389/fcell.2021.781285 (PMC8669964; doi:10.3389/fcell.2021.781285)
Supplement: Supplementary file 1 [file Table2.XLSX]

## Sheet: Decision tree
Number of features	Autonomic ganglia	Bone	Breast	Central nervous system	Endometrium	Fibroblast	Haematopoietic and lymphoid tissue	Kidney	Large Intestine	Liver	Lung	Oesophagus	Ovary	Pancreas	Skin	Soft tissue	Stomach	Thyroid	Upper aerodigestive tract	Urinary tract	Overall accuracy	MCC
10	1	0.75	0.509804	0.723077	0.75	0.891892	0.982659	0.75	0.696429	0.6	0.31383	0.62963	0.595745	0.560976	0.755102	0.678571	0.702703	0.75	0.580645	0.8	0.67004	0.647467
20	0.9375	0.65	0.529412	0.753846	0.714286	0.945946	0.982659	0.75	0.785714	0.64	0.303191	0.851852	0.659574	0.585366	0.693878	0.75	0.756757	0.583333	0.483871	0.68	0.678138	0.657732
30	0.875	0.95	0.627451	0.753846	0.75	0.918919	0.947977	0.84375	0.732143	0.72	0.303191	0.444444	0.510638	0.658537	0.795918	0.714286	0.648649	0.75	0.774194	0.72	0.681174	0.659159
40	1	0.9	0.627451	0.707692	0.785714	0.945946	0.959538	0.8125	0.660714	0.68	0.292553	0.777778	0.553191	0.707317	0.857143	0.535714	0.702703	0.75	0.741935	0.88	0.691296	0.671028
50	0.9375	0.8	0.607843	0.692308	0.75	0.972973	0.936416	0.71875	0.714286	0.88	0.31383	0.666667	0.595745	0.707317	0.857143	0.821429	0.702703	0.916667	0.806452	0.72	0.698381	0.677749
60	0.9375	0.75	0.588235	0.784615	0.821429	1	0.965318	0.8125	0.75	0.88	0.345745	0.777778	0.553191	0.756098	0.77551	0.642857	0.675676	0.916667	0.83871	0.8	0.717611	0.699199
70	0.9375	0.75	0.54902	0.784615	0.785714	0.972973	0.959538	0.90625	0.75	0.68	0.393617	0.666667	0.638298	0.756098	0.816327	0.714286	0.540541	0.916667	0.709677	0.84	0.716599	0.695459
80	0.9375	0.85	0.627451	0.707692	0.678571	0.945946	0.947977	0.84375	0.732143	0.8	0.393617	0.740741	0.638298	0.682927	0.918367	0.642857	0.72973	0.916667	0.709677	0.76	0.718623	0.697466
90	1	0.9	0.686275	0.676923	0.714286	1	0.959538	0.8125	0.732143	0.84	0.404255	0.740741	0.638298	0.829268	0.918367	0.607143	0.783784	0.75	0.709677	0.76	0.733806	0.71412
100	0.9375	0.95	0.803922	0.630769	0.714286	0.972973	0.953757	0.84375	0.910714	0.92	0.425532	0.777778	0.617021	0.780488	0.857143	0.785714	0.72973	0.833333	0.83871	0.84	0.757085	0.739401
110	0.8125	0.85	0.745098	0.723077	0.821429	0.972973	0.930636	0.78125	0.660714	0.88	0.393617	0.703704	0.659574	0.756098	0.897959	0.75	0.783784	0.833333	0.709677	0.84	0.729757	0.70985
120	0.875	0.9	0.705882	0.753846	0.75	0.972973	0.959538	0.90625	0.857143	0.72	0.37234	0.777778	0.617021	0.682927	0.897959	0.785714	0.702703	0.916667	0.806452	0.88	0.741903	0.724456
130	0.9375	0.85	0.666667	0.846154	0.892857	0.972973	0.965318	0.8125	0.714286	0.84	0.446809	0.740741	0.638298	0.780488	0.938776	0.75	0.702703	0.916667	0.774194	0.6	0.754049	0.735926
140	0.875	0.95	0.745098	0.784615	0.857143	0.972973	0.930636	0.84375	0.732143	0.84	0.398936	0.481481	0.638298	0.609756	0.816327	0.75	0.594595	0.833333	0.709677	0.68	0.715587	0.695374
150	0.75	0.9	0.705882	0.769231	0.785714	0.972973	0.919075	0.8125	0.875	0.88	0.484043	0.555556	0.680851	0.634146	0.918367	0.785714	0.702703	0.916667	0.677419	0.84	0.748988	0.730369
160	0.875	0.9	0.745098	0.769231	0.785714	1	0.947977	0.875	0.785714	0.84	0.420213	0.592593	0.638298	0.780488	0.816327	0.607143	0.72973	1	0.870968	0.76	0.743927	0.724786
170	1	0.75	0.686275	0.738462	0.678571	0.972973	0.959538	0.875	0.803571	0.88	0.382979	0.703704	0.723404	0.658537	0.857143	0.892857	0.648649	0.833333	0.612903	0.76	0.729757	0.711504
180	0.8125	0.8	0.627451	0.723077	0.785714	0.945946	0.965318	0.90625	0.785714	0.8	0.414894	0.555556	0.744681	0.731707	0.77551	0.785714	0.621622	0.833333	0.774194	0.84	0.729757	0.710725
190	0.9375	0.8	0.705882	0.738462	0.678571	0.972973	0.942197	0.84375	0.75	0.88	0.420213	0.814815	0.765957	0.658537	0.877551	0.714286	0.675676	0.75	0.677419	0.84	0.73583	0.71656
200	1	0.9	0.686275	0.753846	0.857143	0.972973	0.959538	0.78125	0.857143	0.8	0.462766	0.851852	0.617021	0.682927	0.897959	0.571429	0.648649	0.833333	0.709677	0.8	0.748988	0.73064
210	0.9375	0.95	0.627451	0.707692	0.857143	0.918919	0.936416	0.96875	0.785714	0.76	0.420213	0.777778	0.723404	0.707317	0.938776	0.678571	0.648649	1	0.774194	0.8	0.742915	0.724346
220	1	0.9	0.647059	0.738462	0.928571	0.945946	0.965318	0.8125	0.767857	0.76	0.5	0.814815	0.744681	0.731707	0.857143	0.714286	0.675676	0.833333	0.870968	0.72	0.763158	0.743676
230	0.875	0.9	0.803922	0.707692	0.857143	0.918919	0.959538	0.78125	0.714286	0.8	0.478723	0.740741	0.680851	0.707317	0.918367	0.821429	0.810811	0.75	0.806452	0.68	0.757085	0.739022
240	0.9375	0.8	0.627451	0.861538	0.857143	0.945946	0.942197	0.84375	0.696429	0.72	0.37766	0.703704	0.638298	0.780488	0.857143	0.821429	0.621622	0.916667	0.774194	0.64	0.724696	0.704613
250	1	0.9	0.666667	0.738462	0.821429	0.972973	0.965318	0.875	0.75	0.8	0.382979	0.740741	0.638298	0.658537	0.857143	0.714286	0.72973	0.916667	0.83871	0.64	0.731781	0.713067
260	0.875	0.85	0.705882	0.769231	0.892857	0.945946	0.965318	0.875	0.714286	0.72	0.478723	0.703704	0.638298	0.756098	0.795918	0.892857	0.675676	0.75	0.870968	0.76	0.753036	0.733259
270	1	0.85	0.588235	0.753846	0.821429	1	0.953757	0.8125	0.696429	0.6	0.462766	0.814815	0.808511	0.682927	0.897959	0.821429	0.72973	0.833333	0.870968	0.68	0.748988	0.7299
280	0.9375	0.95	0.686275	0.753846	0.892857	1	0.971098	0.78125	0.821429	0.64	0.404255	0.703704	0.659574	0.560976	0.918367	0.928571	0.648649	0.916667	0.774194	0.76	0.741903	0.723381
290	0.8125	0.95	0.666667	0.723077	0.785714	0.972973	0.947977	0.875	0.660714	0.68	0.425532	0.740741	0.659574	0.756098	0.918367	0.785714	0.648649	0.833333	0.774194	0.76	0.731781	0.711806
300	0.875	0.8	0.627451	0.861538	0.821429	0.945946	0.982659	0.8125	0.696429	0.88	0.462766	0.777778	0.680851	0.585366	0.918367	0.714286	0.648649	0.916667	0.870968	0.76	0.752024	0.731783
310	0.875	0.95	0.705882	0.738462	0.714286	0.972973	0.982659	0.8125	0.75	0.84	0.340426	0.888889	0.574468	0.682927	0.918367	0.892857	0.702703	0.833333	0.806452	0.88	0.736842	0.719082
320	0.875	0.85	0.647059	0.769231	0.75	0.918919	0.976879	0.90625	0.714286	0.84	0.478723	0.888889	0.638298	0.658537	0.979592	0.821429	0.675676	0.916667	0.935484	0.68	0.761134	0.742708
330	1	0.8	0.784314	0.707692	0.785714	0.972973	0.971098	0.9375	0.785714	0.8	0.462766	0.740741	0.638298	0.682927	0.897959	0.642857	0.783784	0.833333	0.806452	0.84	0.759109	0.74152
340	0.9375	0.95	0.72549	0.738462	0.857143	0.972973	0.971098	0.8125	0.75	0.8	0.414894	0.814815	0.787234	0.658537	0.857143	0.821429	0.756757	0.916667	0.870968	0.76	0.758097	0.74017
350	1	0.85	0.686275	0.738462	0.714286	0.891892	0.947977	0.8125	0.75	0.72	0.398936	0.666667	0.765957	0.634146	0.959184	0.785714	0.675676	0.916667	0.741935	0.72	0.728745	0.709407
360	1	0.95	0.686275	0.815385	0.892857	0.972973	0.965318	0.875	0.803571	0.68	0.478723	0.666667	0.723404	0.658537	0.836735	0.785714	0.594595	0.833333	0.83871	0.92	0.763158	0.745949
370	0.875	0.75	0.764706	0.676923	0.857143	0.972973	0.971098	0.8125	0.696429	0.88	0.457447	0.703704	0.680851	0.658537	0.877551	0.857143	0.783784	0.916667	0.870968	0.76	0.753036	0.733815
380	1	0.85	0.686275	0.753846	0.75	0.972973	0.976879	0.84375	0.714286	0.92	0.478723	0.851852	0.723404	0.731707	0.938776	0.714286	0.648649	1	0.83871	0.76	0.766194	0.748807
390	1	0.9	0.843137	0.753846	0.857143	0.972973	0.982659	0.78125	0.732143	0.84	0.478723	0.814815	0.574468	0.658537	0.897959	0.892857	0.675676	0.916667	0.83871	0.88	0.771255	0.754207
400	0.9375	0.8	0.666667	0.830769	0.75	1	0.982659	0.875	0.803571	0.84	0.5	0.740741	0.638298	0.609756	0.918367	0.821429	0.594595	0.916667	0.774194	0.56	0.758097	0.738645

## Sheet: Support vector machine
Number of features	Autonomic ganglia	Bone	Breast	Central nervous system	Endometrium	Fibroblast	Haematopoietic and lymphoid tissue	Kidney	Large Intestine	Liver	Lung	Oesophagus	Ovary	Pancreas	Skin	Soft tissue	Stomach	Thyroid	Upper aerodigestive tract	Urinary tract	Overall accuracy	MCC
10	0.8125	0.45	0.352941	0.630769	0.25	0.864865	0.988439	0.6875	0.625	0.28	0.138298	0.185185	0.212766	0.170732	0.571429	0.5	0.297297	0.416667	0.451613	0.52	0.493927	0.46515
20	0.875	0.7	0.352941	0.676923	0.464286	1	0.99422	0.78125	0.696429	0.4	0.244681	0.444444	0.382979	0.243902	0.77551	0.535714	0.432432	0.75	0.580645	0.4	0.58502	0.559289
30	1	0.8	0.627451	0.738462	0.535714	0.972973	0.99422	0.90625	0.767857	0.52	0.308511	0.666667	0.446809	0.707317	0.877551	0.678571	0.459459	0.916667	0.580645	0.52	0.675101	0.654434
40	1	0.85	0.666667	0.753846	0.642857	1	0.99422	0.875	0.803571	0.84	0.37234	0.740741	0.489362	0.780488	0.877551	0.75	0.540541	0.916667	0.677419	0.68	0.723684	0.705468
50	1	0.95	0.686275	0.815385	0.642857	1	0.99422	0.9375	0.785714	0.8	0.484043	0.740741	0.531915	0.780488	0.897959	0.785714	0.567568	0.916667	0.741935	0.8	0.762146	0.744191
60	1	0.95	0.784314	0.830769	0.75	1	0.99422	0.9375	0.785714	0.88	0.5	0.740741	0.638298	0.780488	0.938776	0.785714	0.702703	0.916667	0.903226	0.8	0.793522	0.778821
70	1	0.95	0.784314	0.846154	0.714286	1	0.99422	0.9375	0.785714	0.88	0.547872	0.814815	0.723404	0.804878	0.938776	0.821429	0.72973	0.916667	0.903226	0.8	0.811741	0.797407
80	1	0.95	0.784314	0.846154	0.785714	1	0.99422	0.9375	0.875	0.88	0.617021	0.740741	0.638298	0.829268	0.959184	0.928571	0.675676	0.916667	0.903226	0.88	0.830972	0.816821
90	1	1	0.803922	0.861538	0.785714	1	0.99422	0.9375	0.857143	0.92	0.632979	0.814815	0.744681	0.804878	0.938776	0.928571	0.702703	1	0.903226	0.88	0.84413	0.831287
100	1	1	0.803922	0.892308	0.785714	1	0.99422	0.9375	0.857143	0.88	0.643617	0.740741	0.787234	0.804878	0.938776	0.964286	0.837838	1	0.903226	0.88	0.853239	0.840812
110	1	1	0.823529	0.876923	0.821429	1	0.99422	0.9375	0.857143	0.88	0.659574	0.814815	0.787234	0.853659	0.938776	0.928571	0.864865	1	0.967742	0.92	0.864372	0.852836
120	1	1	0.843137	0.876923	0.892857	1	0.99422	0.9375	0.892857	0.96	0.702128	0.814815	0.787234	0.878049	0.938776	0.964286	0.864865	1	0.967742	0.92	0.881579	0.871525
130	1	1	0.843137	0.876923	0.928571	1	0.99422	0.9375	0.875	0.92	0.696809	0.814815	0.787234	0.95122	1	0.964286	0.864865	1	0.967742	0.92	0.885628	0.87594
140	1	1	0.843137	0.907692	1	1	0.99422	0.96875	0.910714	0.92	0.68617	0.851852	0.787234	0.926829	0.979592	0.964286	0.918919	1	0.967742	0.92	0.8917	0.882489
150	1	1	0.862745	0.923077	0.964286	1	0.99422	0.96875	0.892857	0.96	0.691489	0.888889	0.787234	0.926829	0.979592	0.964286	0.918919	1	0.967742	0.92	0.894737	0.885842
160	1	1	0.882353	0.923077	1	1	0.99422	0.96875	0.892857	1	0.664894	0.925926	0.723404	0.926829	1	0.964286	0.891892	1	0.967742	0.92	0.890688	0.881854
170	1	1	0.862745	0.953846	1	1	0.99422	0.96875	0.892857	1	0.680851	0.925926	0.808511	0.926829	0.979592	0.964286	0.945946	1	0.967742	0.88	0.898785	0.890536
180	1	1	0.843137	0.953846	1	1	0.99422	0.96875	0.910714	1	0.680851	0.925926	0.808511	0.926829	0.979592	0.964286	0.945946	1	0.967742	0.92	0.899798	0.891701
190	1	1	0.882353	0.969231	1	1	0.988439	0.96875	0.946429	1	0.696809	0.925926	0.829787	0.95122	0.979592	1	0.945946	1	0.967742	0.92	0.909919	0.902653
200	1	1	0.862745	0.984615	1	1	0.99422	0.96875	0.946429	1	0.696809	0.925926	0.851064	0.95122	0.979592	1	0.945946	1	0.967742	0.92	0.911943	0.904974
210	1	1	0.882353	0.969231	1	1	0.99422	1	0.946429	1	0.670213	0.962963	0.851064	0.926829	0.979592	1	0.945946	1	1	0.92	0.908907	0.9021
220	1	1	0.882353	0.984615	1	1	0.99422	0.96875	0.928571	1	0.68617	0.962963	0.87234	0.926829	1	1	0.945946	1	0.967742	0.92	0.911943	0.90521
230	1	1	0.921569	0.984615	1	1	0.99422	1	0.964286	1	0.648936	0.962963	0.87234	0.95122	0.979592	1	0.945946	1	0.967742	0.96	0.910931	0.904893
240	1	1	0.941176	0.984615	1	1	0.99422	1	0.964286	1	0.680851	0.962963	0.87234	0.95122	1	1	0.945946	1	1	0.96	0.92004	0.914231
250	1	1	0.960784	0.984615	1	1	0.988439	1	0.964286	1	0.680851	1	0.893617	0.95122	1	1	0.945946	1	1	1	0.923077	0.917635
260	1	1	0.960784	0.984615	1	1	0.99422	1	0.946429	1	0.728723	0.962963	0.893617	0.95122	1	1	1	1	1	1	0.933198	0.928238
270	1	1	0.941176	0.984615	1	1	0.99422	1	0.946429	1	0.712766	0.962963	0.893617	0.95122	1	1	1	1	1	1	0.92915	0.923938
280	1	1	0.941176	0.984615	1	1	0.99422	1	0.946429	1	0.728723	0.962963	0.914894	0.95122	1	1	1	1	1	1	0.933198	0.928303
290	1	1	0.960784	0.984615	1	1	0.99422	1	0.946429	1	0.739362	0.962963	0.93617	0.95122	1	1	1	1	1	1	0.937247	0.932536
300	1	1	0.960784	0.984615	1	1	0.99422	1	0.946429	1	0.739362	0.962963	0.93617	0.95122	1	1	1	1	1	1	0.937247	0.932534
310	1	1	0.960784	0.984615	1	1	0.99422	1	0.964286	1	0.75	0.962963	0.957447	0.97561	1	1	1	1	1	1	0.942308	0.938141
320	1	1	0.941176	0.984615	1	1	0.99422	1	0.946429	1	0.755319	0.962963	0.93617	0.97561	1	1	1	1	1	1	0.940283	0.935678
330	1	1	0.960784	0.969231	1	1	0.99422	1	0.964286	1	0.776596	0.962963	0.93617	0.97561	1	1	1	1	1	1	0.945344	0.941169
340	1	1	0.960784	0.969231	1	1	0.99422	1	0.964286	1	0.792553	0.962963	0.93617	0.97561	1	1	1	1	1	1	0.948381	0.944339
350	1	1	0.960784	0.969231	1	1	0.99422	1	0.964286	1	0.787234	0.962963	0.957447	0.97561	1	1	1	1	1	1	0.948381	0.944378
360	1	1	0.960784	0.969231	1	1	0.99422	1	0.946429	1	0.787234	0.962963	0.93617	0.97561	1	1	1	1	1	1	0.946356	0.94211
370	1	1	0.960784	0.969231	1	1	0.99422	1	0.946429	1	0.803191	1	0.93617	0.97561	1	1	1	1	1	1	0.950405	0.946396
380	1	1	0.960784	0.984615	1	1	0.99422	1	0.946429	1	0.797872	1	0.93617	0.97561	1	1	1	1	1	1	0.950405	0.94645
390	1	1	0.960784	0.984615	1	1	0.99422	1	0.946429	1	0.808511	0.962963	0.93617	0.97561	1	1	1	1	1	1	0.951417	0.9475
400	1	1	0.960784	0.984615	1	1	0.99422	1	0.964286	1	0.81383	1	0.93617	0.97561	1	1	1	1	1	1	0.954453	0.950788
410	1	1	0.960784	0.984615	1	1	0.99422	1	0.964286	1	0.829787	1	0.957447	0.97561	1	1	1	1	1	1	0.958502	0.955096
420	1	1	0.960784	0.984615	1	1	0.99422	1	0.964286	1	0.824468	1	0.957447	0.97561	1	1	1	1	1	1	0.95749	0.954025
430	1	1	0.960784	0.984615	1	1	0.99422	1	0.964286	1	0.829787	0.962963	0.957447	0.97561	1	1	1	1	1	1	0.95749	0.953937
440	1	1	0.960784	0.984615	1	1	0.99422	1	0.964286	1	0.835106	1	0.957447	0.97561	1	1	1	1	1	1	0.959514	0.956119
450	1	1	0.980392	0.984615	1	1	0.99422	1	0.964286	1	0.829787	1	0.957447	0.97561	1	1	1	1	1	1	0.959514	0.956202
460	1	1	0.980392	0.984615	1	1	0.99422	1	0.964286	1	0.808511	1	0.957447	0.97561	1	1	1	1	1	1	0.955466	0.951941
470	1	1	0.960784	0.984615	1	1	0.99422	1	0.964286	1	0.81383	1	0.93617	0.97561	1	1	1	1	1	1	0.954453	0.950738
480	1	1	0.960784	0.984615	1	1	0.99422	1	0.964286	1	0.819149	1	0.957447	0.97561	1	1	1	1	1	1	0.956478	0.952915
490	1	1	0.960784	0.984615	1	1	0.99422	1	0.964286	1	0.824468	1	0.957447	0.97561	1	1	1	1	1	1	0.95749	0.953931
500	1	1	0.960784	0.984615	1	1	0.99422	1	0.964286	1	0.835106	1	0.957447	1	1	1	1	1	1	1	0.960526	0.957221
510	1	1	0.960784	0.984615	1	1	0.99422	1	0.964286	1	0.835106	1	0.978723	0.97561	1	1	1	1	1	1	0.960526	0.95726
520	1	1	0.980392	0.984615	1	1	0.99422	1	0.964286	1	0.829787	1	1	1	1	1	1	1	1	1	0.962551	0.959531
530	1	1	0.980392	1	1	1	0.99422	1	0.964286	1	0.835106	1	1	1	1	1	1	1	1	1	0.964575	0.961714
540	1	1	0.960784	1	1	1	0.99422	1	0.964286	1	0.840426	1	0.978723	1	1	1	1	1	1	1	0.963563	0.960519
550	1	1	0.960784	1	1	1	0.99422	1	0.964286	1	0.840426	1	0.978723	1	1	1	1	1	1	1	0.963563	0.960518
560	1	1	0.960784	1	1	1	0.99422	1	0.964286	1	0.840426	1	0.978723	1	1	1	1	1	1	1	0.963563	0.960517
570	1	1	0.960784	1	1	1	0.99422	1	0.964286	1	0.840426	1	0.978723	1	1	1	0.972973	1	1	1	0.962551	0.959408
580	1	1	0.960784	1	1	1	0.99422	1	0.964286	1	0.845745	1	0.978723	1	1	1	1	1	1	1	0.964575	0.961583
590	1	1	0.960784	1	1	1	0.99422	1	0.964286	1	0.840426	1	0.978723	1	1	1	1	1	1	1	0.963563	0.960515
600	1	1	0.960784	1	1	1	0.99422	1	0.964286	1	0.819149	1	0.978723	1	1	1	1	1	1	1	0.959514	0.956251
610	1	1	0.960784	1	1	1	0.99422	1	0.964286	1	0.819149	1	0.978723	1	1	1	1	1	1	1	0.959514	0.956251
620	1	1	0.960784	1	1	1	0.99422	1	0.964286	1	0.819149	1	0.978723	1	1	1	1	1	1	1	0.959514	0.956249
630	1	1	0.960784	1	1	1	0.99422	1	0.964286	1	0.840426	1	0.978723	1	1	1	1	1	1	1	0.963563	0.960522
640	1	1	0.960784	1	1	1	0.99422	1	0.964286	1	0.840426	1	0.978723	1	1	1	1	1	1	1	0.963563	0.960482
650	1	1	0.960784	1	1	1	0.99422	1	0.964286	1	0.845745	1	0.978723	1	1	1	1	1	1	1	0.964575	0.961555
660	1	1	0.960784	1	1	1	0.99422	1	0.964286	1	0.840426	1	0.978723	1	1	1	1	1	1	1	0.963563	0.960482
670	1	1	0.960784	1	1	1	0.99422	1	0.982143	1	0.840426	1	0.978723	1	1	1	1	1	1	1	0.964575	0.961638
680	1	1	0.960784	1	1	1	0.99422	1	0.982143	1	0.845745	1	0.978723	1	1	1	1	1	1	1	0.965587	0.962705
690	1	1	0.960784	1	1	1	0.99422	1	0.982143	1	0.845745	1	0.978723	1	1	1	1	1	1	1	0.965587	0.962701
700	1	1	0.960784	1	1	1	0.99422	1	0.982143	1	0.861702	1	0.978723	1	1	1	1	1	1	1	0.968623	0.965931
710	1	1	0.960784	1	1	1	0.99422	1	0.982143	1	0.856383	1	0.978723	1	1	1	1	1	1	1	0.967611	0.96485
720	1	1	0.960784	1	1	1	0.99422	1	0.982143	1	0.861702	1	0.978723	1	1	1	1	1	1	1	0.968623	0.965931
730	1	1	0.960784	1	1	1	0.99422	1	0.982143	1	0.867021	0.962963	0.978723	1	1	1	1	1	1	1	0.968623	0.965905
740	1	1	0.960784	1	1	1	0.99422	1	0.964286	1	0.856383	0.962963	0.978723	1	1	1	1	1	1	1	0.965587	0.962607
750	1	1	0.960784	1	1	1	0.99422	1	0.964286	1	0.856383	1	0.978723	1	1	1	1	1	1	1	0.966599	0.963719
760	1	1	0.960784	1	1	1	0.99422	1	0.946429	1	0.861702	1	0.978723	1	1	1	1	1	1	1	0.966599	0.963677
770	1	1	0.960784	1	1	1	0.99422	1	0.964286	1	0.867021	1	0.978723	1	1	1	1	1	1	1	0.968623	0.965864
780	1	1	0.960784	1	1	1	0.99422	1	0.964286	1	0.87234	1	0.978723	1	1	1	1	1	1	1	0.969636	0.966946
790	1	1	0.960784	1	1	1	0.99422	1	0.964286	1	0.867021	1	0.978723	1	1	1	1	1	1	1	0.968623	0.965865
800	1	1	0.960784	1	1	1	0.99422	1	0.964286	1	0.867021	1	0.978723	1	1	1	1	1	1	1	0.968623	0.965865
810	1	1	0.960784	1	1	1	0.99422	1	0.964286	1	0.856383	1	0.978723	1	1	1	1	1	1	1	0.966599	0.963706
820	1	1	0.960784	1	1	1	0.99422	1	0.964286	1	0.87234	1	0.978723	1	1	1	1	1	1	1	0.969636	0.966956
830	1	1	0.960784	0.984615	1	1	0.99422	1	0.964286	1	0.87766	1	0.978723	1	1	1	1	1	1	1	0.969636	0.966922
840	1	1	0.960784	0.984615	1	1	0.99422	1	0.964286	1	0.87234	1	0.978723	1	1	1	1	1	1	1	0.968623	0.965847
850	1	1	0.960784	0.984615	1	1	0.99422	1	0.964286	1	0.87766	1	0.978723	1	1	1	1	1	1	1	0.969636	0.966931
860	1	1	0.960784	0.984615	1	1	0.99422	1	0.964286	1	0.882979	1	0.978723	1	1	1	1	1	1	1	0.970648	0.968016
870	1	1	0.960784	0.984615	1	1	0.99422	1	0.964286	1	0.87766	1	0.978723	1	1	1	1	1	1	1	0.969636	0.96694
880	1	1	0.960784	0.984615	1	1	0.99422	1	0.964286	1	0.87766	1	0.978723	1	1	1	1	1	1	1	0.969636	0.966938
890	1	1	0.960784	0.984615	1	1	0.99422	1	0.964286	1	0.87766	1	0.978723	1	1	1	1	1	1	1	0.969636	0.966938
900	1	1	0.960784	1	1	1	0.99422	1	0.964286	1	0.867021	1	0.978723	1	1	1	1	1	1	1	0.968623	0.965899
910	1	1	0.960784	1	1	1	0.99422	1	0.964286	1	0.87766	1	0.978723	1	1	1	1	1	1	1	0.970648	0.968057
920	1	1	0.960784	1	1	1	0.99422	1	0.964286	1	0.87766	1	0.978723	1	1	1	1	1	1	1	0.970648	0.968057
930	1	1	0.960784	1	1	1	0.99422	1	0.946429	1	0.87766	1	0.978723	1	1	1	1	1	1	1	0.969636	0.966925
940	1	1	0.960784	1	1	1	0.99422	1	0.946429	1	0.87766	0.962963	0.978723	1	1	1	1	1	1	1	0.968623	0.965818
950	1	1	0.960784	1	1	1	0.99422	1	0.946429	1	0.856383	0.962963	0.978723	1	1	1	1	1	1	1	0.964575	0.961495
960	1	1	0.960784	1	1	1	0.99422	1	0.946429	1	0.87766	0.962963	0.978723	1	1	1	1	1	1	1	0.968623	0.965802
970	1	1	0.960784	1	1	1	0.99422	1	0.946429	1	0.856383	0.962963	0.978723	1	1	1	1	1	1	1	0.964575	0.961483
980	1	1	0.960784	1	1	1	0.99422	1	0.946429	1	0.87234	0.962963	0.978723	1	1	1	1	1	1	1	0.967611	0.964719
990	1	1	0.960784	1	1	1	0.99422	1	0.946429	1	0.87766	0.962963	0.978723	1	1	1	1	1	1	1	0.968623	0.965804
1000	1	1	0.960784	1	1	1	0.99422	1	0.946429	1	0.87234	0.962963	0.978723	1	1	1	1	1	1	1	0.967611	0.964719
1010	1	1	0.960784	1	1	1	0.99422	1	0.946429	1	0.87234	0.962963	0.978723	1	1	1	1	1	1	1	0.967611	0.964722
1020	1	1	0.960784	1	1	1	0.99422	1	0.946429	1	0.867021	0.962963	0.978723	1	1	1	1	1	1	1	0.966599	0.963646
1030	1	1	0.960784	1	1	1	0.99422	1	0.964286	1	0.861702	0.962963	0.978723	1	1	1	1	1	1	1	0.966599	0.963674
1040	1	1	0.960784	1	1	1	0.99422	1	0.964286	1	0.861702	0.962963	0.978723	1	1	1	1	1	1	1	0.966599	0.963674
1050	1	1	0.960784	1	1	1	0.99422	1	0.964286	1	0.856383	1	0.978723	1	1	1	1	1	1	1	0.966599	0.963707
1060	1	1	0.960784	1	1	1	0.99422	1	0.964286	1	0.861702	1	0.978723	1	1	1	1	1	1	1	0.967611	0.964782
1070	1	1	0.960784	1	1	1	0.99422	1	0.964286	1	0.861702	1	0.978723	1	1	1	1	1	1	1	0.967611	0.964788
1080	1	1	0.960784	1	1	1	0.99422	1	0.964286	1	0.861702	1	0.978723	1	1	1	1	1	1	1	0.967611	0.964788
1090	1	1	0.960784	1	1	1	0.99422	1	0.964286	1	0.861702	1	0.978723	1	1	1	1	1	1	1	0.967611	0.964781
1100	1	1	0.960784	1	1	1	0.99422	1	0.964286	1	0.861702	1	0.978723	1	1	1	1	1	1	1	0.967611	0.964776
1110	1	1	0.960784	1	1	1	0.99422	1	0.964286	1	0.861702	1	0.978723	1	1	1	1	1	1	1	0.967611	0.964781
1120	1	1	0.960784	1	1	1	0.99422	1	0.964286	1	0.87766	1	0.978723	1	1	1	1	1	1	1	0.970648	0.968018
1130	1	1	0.960784	1	1	1	0.99422	1	0.964286	1	0.87234	1	0.978723	1	1	1	1	1	1	1	0.969636	0.966936
1140	1	1	0.960784	1	1	1	0.99422	1	0.982143	1	0.882979	1	0.978723	1	1	1	1	1	1	1	0.972672	0.970245
1150	1	1	0.960784	1	1	1	0.99422	1	0.982143	1	0.888298	1	0.978723	1	1	1	1	1	1	1	0.973684	0.971322
1160	1	1	0.960784	1	1	1	0.99422	1	0.982143	1	0.893617	1	0.978723	1	1	1	1	1	1	1	0.974696	0.972408
1170	1	1	0.960784	1	1	1	0.99422	1	0.982143	1	0.898936	1	0.978723	1	1	1	1	1	1	1	0.975709	0.973493
1180	1	1	0.960784	1	1	1	0.99422	1	0.982143	1	0.898936	1	0.978723	1	1	1	1	1	1	1	0.975709	0.973494
1190	1	1	0.960784	1	1	1	0.99422	1	0.982143	1	0.888298	1	0.978723	1	1	1	1	1	1	1	0.973684	0.971296
1200	1	1	0.960784	1	1	1	0.99422	1	0.982143	1	0.893617	1	0.978723	1	1	1	1	1	1	1	0.974696	0.972406
1210	1	1	0.960784	1	1	1	0.99422	1	0.982143	1	0.893617	1	0.978723	1	1	1	1	1	1	1	0.974696	0.972406
1220	1	1	0.960784	1	1	1	0.99422	1	0.982143	1	0.882979	1	0.978723	1	1	1	1	1	1	1	0.972672	0.97024
1230	1	1	0.960784	1	1	1	0.99422	1	0.982143	1	0.888298	1	0.978723	1	1	1	1	1	1	1	0.973684	0.971325
1240	1	1	0.960784	1	1	1	0.99422	1	0.982143	1	0.893617	1	0.978723	1	1	1	1	1	1	1	0.974696	0.972408
1250	1	1	0.960784	1	1	1	0.99422	1	0.982143	1	0.893617	1	0.978723	1	1	1	1	1	1	1	0.974696	0.972408
1260	1	1	0.960784	1	1	1	0.99422	1	0.982143	1	0.898936	1	0.978723	1	1	1	1	1	1	1	0.975709	0.973469
1270	1	1	0.960784	1	1	1	0.99422	1	0.982143	1	0.87766	1	0.978723	1	1	1	1	1	1	1	0.97166	0.969129
1280	1	1	0.960784	1	1	1	0.99422	1	0.982143	1	0.87234	1	0.978723	1	1	1	1	1	1	1	0.970648	0.968051
1290	1	1	0.960784	1	1	1	0.99422	1	0.964286	1	0.87766	1	0.978723	1	1	1	1	1	1	1	0.970648	0.968021
1300	1	1	0.960784	1	1	1	0.99422	1	0.982143	1	0.882979	1	0.978723	1	1	1	1	1	1	1	0.972672	0.970247
1310	1	1	0.960784	1	1	1	0.99422	1	0.982143	1	0.888298	1	0.978723	1	1	1	1	1	1	1	0.973684	0.971325
1320	1	1	0.960784	1	1	1	0.99422	1	0.982143	1	0.888298	1	0.978723	1	1	1	1	1	1	1	0.973684	0.971327
1330	1	1	0.960784	1	1	1	0.99422	1	0.982143	1	0.882979	1	0.978723	1	1	1	1	1	1	1	0.972672	0.970247
1340	1	1	0.960784	1	1	1	0.99422	1	0.982143	1	0.888298	1	0.978723	1	1	1	1	1	1	1	0.973684	0.971327
1350	1	1	0.960784	1	1	1	0.99422	1	0.982143	1	0.888298	1	0.978723	1	1	1	1	1	1	1	0.973684	0.971327
1360	1	1	0.960784	1	1	1	0.99422	1	0.982143	1	0.888298	1	0.978723	1	1	1	1	1	1	1	0.973684	0.971327
1370	1	1	0.960784	1	1	1	0.99422	1	0.982143	1	0.888298	1	0.978723	1	1	1	1	1	1	1	0.973684	0.971327
1380	1	1	0.960784	1	1	1	0.99422	1	0.982143	1	0.888298	1	0.978723	1	1	1	1	1	1	1	0.973684	0.97133
1390	1	1	0.960784	1	1	1	0.99422	1	0.982143	1	0.882979	1	0.978723	1	1	1	1	1	1	1	0.972672	0.970248
1400	1	1	0.960784	1	1	1	0.99422	1	0.982143	1	0.893617	1	0.978723	1	1	1	1	1	1	1	0.974696	0.972409
1410	1	1	0.960784	1	1	1	0.99422	1	0.982143	1	0.898936	1	0.978723	1	1	1	1	1	1	1	0.975709	0.973497
1420	1	1	0.960784	1	1	1	0.99422	1	0.982143	1	0.882979	1	0.978723	1	1	1	1	1	1	1	0.972672	0.970237
1430	1	1	0.960784	1	1	1	0.99422	1	0.982143	1	0.882979	1	0.978723	1	1	1	1	1	1	1	0.972672	0.97025
1440	1	1	0.960784	1	1	1	0.99422	1	0.982143	1	0.87766	1	0.978723	1	1	1	1	1	1	1	0.97166	0.969174
1450	1	1	0.960784	1	1	1	0.99422	1	0.982143	1	0.867021	1	0.978723	1	1	1	1	1	1	1	0.969636	0.967011
1460	1	1	0.960784	1	1	1	0.99422	1	0.982143	1	0.87766	1	0.978723	1	1	1	1	1	1	1	0.97166	0.969167
1470	1	1	0.960784	1	1	1	0.99422	1	0.982143	1	0.87234	1	0.978723	1	1	1	1	1	1	1	0.970648	0.968086
1480	1	1	0.960784	1	1	1	0.99422	1	0.982143	1	0.867021	1	0.978723	1	1	1	1	1	1	1	0.969636	0.966998
1490	1	1	0.960784	1	1	1	0.99422	1	0.982143	1	0.87234	1	0.978723	1	1	1	1	1	1	1	0.970648	0.968079
1500	1	1	0.960784	1	1	1	0.99422	1	0.982143	1	0.867021	1	0.978723	1	1	1	1	1	1	1	0.969636	0.967
1510	1	1	0.960784	1	1	1	0.99422	1	0.982143	1	0.861702	1	0.978723	1	1	1	1	1	1	1	0.968623	0.965922
1520	1	1	0.960784	1	1	1	0.99422	1	0.982143	1	0.867021	1	0.957447	1	1	1	1	1	1	1	0.968623	0.965855
1530	1	1	0.960784	1	1	1	0.99422	1	0.982143	1	0.861702	1	0.957447	1	1	1	1	1	1	1	0.967611	0.964776
1540	1	1	0.960784	1	1	1	0.99422	1	0.982143	1	0.867021	1	0.957447	1	1	1	1	1	1	1	0.968623	0.965862
1550	1	1	0.960784	1	1	1	0.99422	1	0.982143	1	0.87234	1	0.957447	1	1	1	1	1	1	1	0.969636	0.966944
1560	1	1	0.960784	1	1	1	0.99422	1	0.982143	1	0.87766	1	0.957447	1	1	1	1	1	1	1	0.970648	0.96802
1570	1	1	0.960784	1	1	1	0.99422	1	0.982143	1	0.882979	1	0.957447	1	1	1	1	1	1	1	0.97166	0.969105
1580	1	1	0.960784	1	1	1	0.99422	1	0.982143	1	0.87766	1	0.957447	1	1	1	1	1	1	1	0.970648	0.968023
1590	1	1	0.960784	1	1	1	0.99422	1	0.982143	1	0.87766	1	0.957447	1	1	1	1	1	1	1	0.970648	0.96802
1600	1	1	0.960784	1	1	1	0.99422	1	0.982143	1	0.87766	1	0.957447	1	1	1	1	1	1	1	0.970648	0.96802
1610	1	1	0.960784	1	1	1	0.99422	1	0.982143	1	0.882979	1	0.957447	1	1	1	1	1	1	1	0.97166	0.969109
1620	1	1	0.960784	1	1	1	0.99422	1	0.982143	1	0.882979	1	0.957447	1	1	1	1	1	1	1	0.97166	0.969109
1630	1	1	0.960784	1	1	1	0.99422	1	0.982143	1	0.882979	1	0.957447	1	1	1	1	1	1	1	0.97166	0.969108
1640	1	1	0.960784	1	1	1	0.99422	1	0.982143	1	0.882979	1	0.957447	1	1	1	1	1	1	1	0.97166	0.969108
1650	1	1	0.960784	1	1	1	0.99422	1	0.982143	1	0.882979	1	0.957447	1	1	1	1	1	1	1	0.97166	0.969106
1660	1	1	0.960784	1	1	1	0.99422	1	0.982143	1	0.882979	1	0.957447	1	1	1	1	1	1	1	0.97166	0.969108
1670	1	1	0.960784	1	1	1	0.99422	1	0.982143	1	0.893617	1	0.957447	1	1	1	1	1	1	1	0.973684	0.971273
1680	1	1	0.960784	1	1	1	0.99422	1	0.982143	1	0.882979	1	0.957447	1	1	1	1	1	1	1	0.97166	0.9691
1690	1	1	0.960784	1	1	1	0.99422	1	0.982143	1	0.888298	1	0.957447	1	1	1	1	1	1	1	0.972672	0.970191
1700	1	1	0.960784	1	1	1	0.99422	1	0.982143	1	0.888298	1	0.957447	1	1	1	1	1	1	1	0.972672	0.970191
1710	1	1	0.960784	1	1	1	0.99422	1	0.982143	1	0.888298	1	0.957447	1	1	1	1	1	1	1	0.972672	0.970193
1720	1	1	0.960784	1	1	1	0.99422	1	0.982143	1	0.882979	1	0.957447	1	1	1	1	1	1	1	0.97166	0.969113
1730	1	1	0.960784	1	1	1	0.99422	1	0.982143	1	0.888298	1	0.957447	1	1	1	1	1	1	1	0.972672	0.970193
1740	1	1	0.960784	1	1	1	0.99422	1	0.982143	1	0.882979	1	0.957447	1	1	1	1	1	1	1	0.97166	0.969113
1750	1	1	0.960784	1	1	1	0.99422	1	0.982143	1	0.893617	1	0.957447	1	1	1	1	1	1	1	0.973684	0.971277
1760	1	1	0.960784	1	1	1	0.99422	1	0.982143	1	0.87234	1	0.957447	1	1	1	1	1	1	1	0.969636	0.966945
1770	1	1	0.960784	1	1	1	0.99422	1	0.982143	1	0.87766	1	0.957447	1	1	1	1	1	1	1	0.970648	0.968036
1780	1	1	0.960784	1	1	1	0.99422	1	0.982143	1	0.87766	1	0.957447	1	1	1	1	1	1	1	0.970648	0.968035
1790	1	1	0.960784	1	1	1	0.99422	1	0.982143	1	0.882979	1	0.957447	1	1	1	1	1	1	1	0.97166	0.969119
1800	1	1	0.960784	1	1	1	0.99422	1	0.982143	1	0.87234	1	0.957447	1	1	1	1	1	1	1	0.969636	0.966943
1810	1	1	0.960784	1	1	1	0.99422	1	0.982143	1	0.87766	1	0.957447	1	1	1	1	1	1	1	0.970648	0.96803
1820	1	1	0.960784	1	1	1	0.99422	1	0.982143	1	0.888298	1	0.957447	1	1	1	1	1	1	1	0.972672	0.970193
1830	1	1	0.960784	1	1	1	0.99422	1	0.982143	1	0.882979	1	0.957447	1	1	1	1	1	1	1	0.97166	0.969113
1840	1	1	0.960784	1	1	1	0.99422	1	0.982143	1	0.888298	1	0.957447	1	1	1	1	1	1	1	0.972672	0.970198
1850	1	1	0.960784	1	1	1	0.99422	1	0.982143	1	0.882979	1	0.957447	0.97561	1	1	1	1	1	1	0.970648	0.967991
1860	1	1	0.960784	1	1	1	0.99422	1	0.982143	1	0.882979	1	0.957447	0.97561	1	1	1	1	1	1	0.970648	0.967995
1870	1	1	0.960784	1	1	1	0.99422	1	0.982143	1	0.882979	1	0.957447	0.97561	1	1	1	1	1	1	0.970648	0.967996
1880	1	1	0.960784	1	1	1	0.99422	1	0.982143	1	0.882979	1	0.957447	0.97561	1	1	1	1	1	1	0.970648	0.967996
1890	1	1	0.960784	1	1	1	0.99422	1	0.982143	1	0.882979	1	0.957447	0.97561	1	1	1	1	1	1	0.970648	0.967996
1900	1	1	0.960784	1	1	1	0.99422	1	0.982143	1	0.888298	1	0.957447	0.97561	1	1	1	1	1	1	0.97166	0.969078
1910	1	1	0.960784	1	1	1	0.99422	1	0.982143	1	0.882979	1	0.957447	0.97561	1	1	1	1	1	1	0.970648	0.967996
1920	1	1	0.960784	1	1	1	0.99422	1	0.982143	1	0.882979	1	0.957447	0.97561	1	1	1	1	1	1	0.970648	0.967996
1930	1	1	0.960784	1	1	1	0.99422	1	0.982143	1	0.882979	1	0.957447	0.97561	1	1	1	1	1	1	0.970648	0.967996
1940	1	1	0.960784	1	1	1	0.99422	1	0.982143	1	0.882979	1	0.957447	0.97561	1	1	1	1	1	1	0.970648	0.967996
1950	1	1	0.960784	1	1	1	0.99422	1	0.982143	1	0.882979	1	0.957447	0.97561	1	1	1	1	1	1	0.970648	0.967992
1960	1	1	0.960784	1	1	1	0.99422	1	0.982143	1	0.888298	1	0.957447	0.97561	1	1	1	1	1	1	0.97166	0.969076
1970	1	1	0.960784	1	1	1	0.99422	1	0.982143	1	0.888298	1	0.957447	0.97561	1	1	1	1	1	1	0.97166	0.969076
1980	1	1	0.960784	1	1	1	0.99422	1	0.982143	1	0.893617	1	0.957447	0.97561	1	1	1	1	1	1	0.972672	0.970162
1990	1	1	0.960784	1	1	1	0.99422	1	0.982143	1	0.893617	1	0.957447	0.97561	1	1	1	1	1	1	0.972672	0.970164
2000	1	1	0.960784	1	1	1	0.99422	1	0.982143	1	0.893617	1	0.957447	0.97561	1	1	1	1	1	1	0.972672	0.970162
2010	1	1	0.960784	1	1	1	0.99422	1	0.982143	1	0.893617	1	0.957447	0.97561	1	1	1	1	1	1	0.972672	0.970162
2020	1	1	0.960784	1	1	1	0.99422	1	0.982143	1	0.893617	1	0.957447	1	1	1	1	1	1	1	0.973684	0.971278
2030	1	1	0.960784	1	1	1	0.99422	1	0.982143	1	0.888298	1	0.957447	1	1	1	1	1	1	1	0.972672	0.970191
2040	1	1	0.960784	1	1	1	0.99422	1	0.982143	1	0.888298	1	0.957447	1	1	1	1	1	1	1	0.972672	0.970191
2050	1	1	0.960784	1	1	1	0.99422	1	0.982143	1	0.882979	1	0.957447	1	1	1	1	1	1	1	0.97166	0.969106
2060	1	1	0.960784	1	1	1	0.99422	1	0.982143	1	0.882979	1	0.957447	1	1	1	1	1	1	1	0.97166	0.96911
2070	1	1	0.960784	1	1	1	0.99422	1	0.982143	1	0.882979	1	0.957447	1	1	1	1	1	1	1	0.97166	0.969112
2080	1	1	0.960784	1	1	1	0.99422	1	0.982143	1	0.882979	1	0.957447	1	1	1	1	1	1	1	0.97166	0.969112
2090	1	1	0.960784	1	1	1	0.99422	1	0.982143	1	0.888298	1	0.957447	1	1	1	1	1	1	1	0.972672	0.970192
2100	1	1	0.960784	1	1	1	0.99422	1	0.982143	1	0.888298	1	0.957447	1	1	1	1	1	1	1	0.972672	0.970192
2110	1	1	0.960784	1	1	1	0.99422	1	0.982143	1	0.888298	1	0.957447	1	1	1	1	1	1	1	0.972672	0.970192
2120	1	1	0.960784	1	1	1	0.99422	1	0.982143	1	0.888298	1	0.957447	1	1	1	1	1	1	1	0.972672	0.970192
2130	1	1	0.960784	1	1	1	0.99422	1	0.982143	1	0.888298	1	0.957447	1	1	1	1	1	1	1	0.972672	0.970192
2140	1	1	0.960784	1	1	1	0.99422	1	0.982143	1	0.888298	1	0.957447	1	1	1	1	1	1	1	0.972672	0.970192
2150	1	1	0.960784	1	1	1	0.99422	1	0.982143	1	0.888298	1	0.957447	1	1	1	1	1	1	1	0.972672	0.970192
2160	1	1	0.960784	1	1	1	0.99422	1	0.982143	1	0.888298	1	0.957447	1	1	1	1	1	1	1	0.972672	0.970191
2170	1	1	0.960784	1	1	1	0.99422	1	0.982143	1	0.888298	1	0.957447	1	1	1	1	1	1	1	0.972672	0.970191
2180	1	1	0.960784	1	1	1	0.99422	1	0.982143	1	0.888298	1	0.957447	0.97561	1	1	1	1	1	1	0.97166	0.969077
2190	1	1	0.960784	1	1	1	0.99422	1	0.982143	1	0.888298	1	0.957447	0.97561	1	1	1	1	1	1	0.97166	0.969049
2200	1	1	0.960784	1	1	1	0.99422	1	0.982143	1	0.893617	1	0.957447	0.97561	1	1	1	1	1	1	0.972672	0.970138
2210	1	1	0.960784	1	1	1	0.99422	1	0.982143	1	0.893617	1	0.957447	0.97561	1	1	1	1	1	1	0.972672	0.970138
2220	1	1	0.960784	1	1	1	0.99422	1	0.982143	1	0.893617	1	0.957447	0.97561	1	1	1	1	1	1	0.972672	0.970138
2230	1	1	0.960784	1	1	1	0.99422	1	0.982143	1	0.893617	1	0.957447	0.97561	1	1	1	1	1	1	0.972672	0.970138
2240	1	1	0.960784	1	1	1	0.99422	1	0.982143	1	0.893617	1	0.957447	0.97561	1	1	1	1	1	1	0.972672	0.970138
2250	1	1	0.960784	1	1	1	0.99422	1	0.982143	1	0.893617	1	0.957447	0.97561	1	1	1	1	1	1	0.972672	0.97014
2260	1	1	0.960784	1	1	1	0.99422	1	0.982143	1	0.893617	1	0.957447	0.97561	1	1	1	1	1	1	0.972672	0.970138
2270	1	1	0.960784	1	1	1	0.99422	1	0.982143	1	0.888298	1	0.957447	0.97561	1	1	1	1	1	1	0.97166	0.969051
2280	1	1	0.960784	1	1	1	0.99422	1	0.982143	1	0.893617	1	0.957447	0.97561	1	1	1	1	1	1	0.972672	0.970138
2290	1	1	0.960784	1	1	1	0.99422	1	0.982143	1	0.893617	1	0.957447	0.97561	1	1	1	1	1	1	0.972672	0.970138
2300	1	1	0.960784	1	1	1	0.99422	1	0.982143	1	0.893617	1	0.957447	0.97561	1	1	1	1	1	1	0.972672	0.970138
2310	1	1	0.960784	1	1	1	0.99422	1	0.982143	1	0.893617	1	0.957447	0.97561	1	1	1	1	1	1	0.972672	0.970138
2320	1	1	0.960784	1	1	1	0.99422	1	0.982143	1	0.893617	1	0.957447	0.97561	1	1	1	1	1	1	0.972672	0.970138
2330	1	1	0.960784	1	1	1	0.99422	1	0.982143	1	0.893617	1	0.957447	0.97561	1	1	1	1	1	1	0.972672	0.970138
2340	1	1	0.960784	1	1	1	0.99422	1	0.982143	1	0.898936	1	0.957447	0.97561	1	1	1	1	1	1	0.973684	0.971229
2350	1	1	0.960784	1	1	1	0.99422	1	0.982143	1	0.898936	1	0.957447	0.97561	1	1	1	1	1	1	0.973684	0.971229
2360	1	1	0.960784	1	1	1	0.99422	1	0.982143	1	0.898936	1	0.957447	0.97561	1	1	1	1	1	1	0.973684	0.971227
2370	1	1	0.960784	1	1	1	0.99422	1	0.982143	1	0.898936	1	0.957447	0.97561	1	1	1	1	1	1	0.973684	0.971251
2380	1	1	0.960784	1	1	1	0.99422	1	0.982143	1	0.898936	1	0.957447	0.97561	1	1	1	1	1	1	0.973684	0.971249
2390	1	1	0.960784	1	1	1	0.99422	1	0.982143	1	0.893617	1	0.957447	0.97561	1	1	1	1	1	1	0.972672	0.970136
2400	1	1	0.960784	1	1	1	0.99422	1	0.982143	1	0.893617	1	0.957447	0.97561	1	1	1	1	1	1	0.972672	0.970136
2410	1	1	0.960784	1	1	1	0.99422	1	0.982143	1	0.898936	1	0.957447	0.97561	1	1	1	1	1	1	0.973684	0.971247
2420	1	1	0.960784	1	1	1	0.99422	1	0.982143	1	0.898936	1	0.957447	0.97561	1	1	1	1	1	1	0.973684	0.971247
2430	1	1	0.960784	1	1	1	0.99422	1	0.982143	1	0.898936	1	0.957447	0.97561	1	1	1	1	1	1	0.973684	0.971251
2440	1	1	0.960784	1	1	1	0.99422	1	0.982143	1	0.898936	1	0.957447	0.97561	1	1	1	1	1	1	0.973684	0.971247
2450	1	1	0.960784	1	1	1	0.99422	1	0.982143	1	0.898936	1	0.957447	0.97561	1	1	1	1	1	1	0.973684	0.971247
2460	1	1	0.960784	1	1	1	0.99422	1	0.982143	1	0.898936	1	0.957447	0.97561	1	1	1	1	1	1	0.973684	0.971247
2470	1	1	0.960784	1	1	1	0.99422	1	0.982143	1	0.898936	1	0.957447	0.97561	1	1	1	1	1	1	0.973684	0.971247
2480	1	1	0.960784	1	1	1	0.99422	1	0.982143	1	0.898936	1	0.957447	0.97561	1	1	1	1	1	1	0.973684	0.971247
2490	1	1	0.960784	1	1	1	0.99422	1	0.982143	1	0.898936	1	0.957447	0.97561	1	1	1	1	1	1	0.973684	0.971248
2500	1	1	0.960784	1	1	1	0.99422	1	0.982143	1	0.898936	1	0.957447	0.97561	1	1	1	1	1	1	0.973684	0.971248
2510	1	1	0.960784	1	1	1	0.99422	1	0.982143	1	0.898936	1	0.957447	0.97561	1	1	1	1	1	1	0.973684	0.971248
2520	1	1	0.960784	1	1	1	0.99422	1	0.982143	1	0.898936	1	0.957447	0.97561	1	1	1	1	1	1	0.973684	0.971248
2530	1	1	0.960784	1	1	1	0.99422	1	0.982143	1	0.898936	1	0.957447	0.97561	1	1	1	1	1	1	0.973684	0.971248
2540	1	1	0.960784	1	1	1	0.99422	1	0.982143	1	0.898936	1	0.957447	0.97561	1	1	1	1	1	1	0.973684	0.971248
2550	1	1	0.960784	1	1	1	0.99422	1	0.982143	1	0.898936	1	0.957447	0.97561	1	1	1	1	1	1	0.973684	0.971249
2560	1	1	0.960784	1	1	1	0.99422	1	0.982143	1	0.898936	1	0.957447	0.97561	1	1	1	1	1	1	0.973684	0.971249
2570	1	1	0.960784	1	1	1	0.99422	1	0.982143	1	0.898936	1	0.957447	0.97561	1	1	1	1	1	1	0.973684	0.971249
2580	1	1	0.960784	1	1	1	0.99422	1	0.982143	1	0.898936	1	0.957447	0.97561	1	1	1	1	1	1	0.973684	0.971249
2590	1	1	0.960784	1	1	1	0.99422	1	0.982143	1	0.898936	1	0.957447	0.97561	1	1	1	1	1	1	0.973684	0.971249
2600	1	1	0.960784	1	1	1	0.99422	1	0.982143	1	0.898936	1	0.957447	0.97561	1	1	1	1	1	1	0.973684	0.971249
2610	1	1	0.960784	1	1	1	0.99422	1	0.982143	1	0.898936	1	0.957447	0.97561	1	1	1	1	1	1	0.973684	0.971249
2620	1	1	0.960784	1	1	1	0.99422	1	0.982143	1	0.898936	1	0.957447	0.97561	1	1	1	1	1	1	0.973684	0.971249
2630	1	1	0.960784	1	1	1	0.99422	1	0.982143	1	0.898936	1	0.957447	0.97561	1	1	1	1	1	1	0.973684	0.971246
2640	1	1	0.960784	1	1	1	0.99422	1	0.982143	1	0.898936	1	0.957447	0.97561	1	1	1	1	1	1	0.973684	0.971246
2650	1	1	0.960784	1	1	1	0.99422	1	0.982143	1	0.898936	1	0.957447	0.97561	1	1	1	1	1	1	0.973684	0.971246
2660	1	1	0.960784	1	1	1	0.99422	1	0.982143	1	0.898936	1	0.957447	0.97561	1	1	1	1	1	1	0.973684	0.971223
2670	1	1	0.960784	1	1	1	0.99422	1	0.982143	1	0.898936	1	0.957447	0.97561	1	1	1	1	1	1	0.973684	0.971223
2680	1	1	0.960784	1	1	1	0.99422	1	0.982143	1	0.898936	1	0.957447	0.97561	1	1	1	1	1	1	0.973684	0.971223
2690	1	1	0.960784	1	1	1	0.99422	1	0.982143	1	0.904255	1	0.957447	0.97561	1	1	1	1	1	1	0.974696	0.972332
2700	1	1	0.960784	1	1	1	0.99422	1	0.982143	1	0.904255	1	0.957447	0.97561	1	1	1	1	1	1	0.974696	0.972332
2710	1	1	0.960784	1	1	1	0.99422	1	0.982143	1	0.904255	1	0.957447	0.97561	1	1	1	1	1	1	0.974696	0.972332
2720	1	1	0.960784	1	1	1	0.99422	1	0.982143	1	0.909574	1	0.957447	0.97561	1	1	1	1	1	1	0.975709	0.9734
2730	1	1	0.960784	1	1	1	0.99422	1	0.982143	1	0.909574	1	0.957447	0.97561	1	1	1	1	1	1	0.975709	0.9734
2740	1	1	0.960784	1	1	1	0.99422	1	0.982143	1	0.909574	1	0.957447	0.97561	1	1	1	1	1	1	0.975709	0.9734
2750	1	1	0.960784	1	1	1	0.99422	1	0.982143	1	0.909574	1	0.957447	0.97561	1	1	1	1	1	1	0.975709	0.9734
2760	1	1	0.960784	1	1	1	0.99422	1	0.982143	1	0.904255	1	0.957447	0.97561	1	1	1	1	1	1	0.974696	0.97231
2770	1	1	0.960784	1	1	1	0.99422	1	0.982143	1	0.909574	1	0.957447	0.97561	1	1	1	1	1	1	0.975709	0.9734
2780	1	1	0.960784	1	1	1	0.99422	1	0.982143	1	0.909574	1	0.957447	0.97561	1	1	1	1	1	1	0.975709	0.9734
2790	1	1	0.960784	1	1	1	0.99422	1	0.982143	1	0.904255	1	0.957447	0.97561	1	1	1	1	1	1	0.974696	0.97231
2800	1	1	0.960784	1	1	1	0.99422	1	0.982143	1	0.904255	1	0.957447	0.97561	1	1	1	1	1	1	0.974696	0.97231
2810	1	1	0.960784	1	1	1	0.99422	1	0.982143	1	0.909574	1	0.957447	0.97561	1	1	1	1	1	1	0.975709	0.9734
2820	1	1	0.960784	1	1	1	0.99422	1	0.982143	1	0.909574	1	0.957447	0.97561	1	1	1	1	1	1	0.975709	0.9734
2830	1	1	0.960784	1	1	1	0.99422	1	0.982143	1	0.909574	1	0.957447	0.97561	1	1	1	1	1	1	0.975709	0.9734
2840	1	1	0.960784	1	1	1	0.99422	1	0.982143	1	0.909574	1	0.957447	0.97561	1	1	1	1	1	1	0.975709	0.9734
2850	1	1	0.960784	1	1	1	0.99422	1	0.982143	1	0.909574	1	0.978723	0.97561	1	1	1	1	1	1	0.976721	0.974533
2860	1	1	0.960784	1	1	1	0.99422	1	0.982143	1	0.909574	1	0.978723	0.97561	1	1	1	1	1	1	0.976721	0.974533
2870	1	1	0.960784	1	1	1	0.99422	1	0.982143	1	0.909574	1	0.957447	0.97561	1	1	1	1	1	1	0.975709	0.9734
2880	1	1	0.960784	1	1	1	0.99422	1	0.982143	1	0.904255	1	0.978723	0.97561	1	1	1	1	1	1	0.975709	0.973442
2890	1	1	0.960784	1	1	1	0.99422	1	0.982143	1	0.904255	1	0.978723	1	1	1	1	1	1	1	0.976721	0.974555
2900	1	1	0.960784	1	1	1	0.99422	1	0.982143	1	0.904255	1	0.978723	1	1	1	1	1	1	1	0.976721	0.974555
2910	1	1	0.960784	1	1	1	0.99422	1	0.982143	1	0.904255	1	0.957447	1	1	1	1	1	1	1	0.975709	0.973421
2920	1	1	0.960784	1	1	1	0.99422	1	0.982143	1	0.904255	1	0.978723	1	1	1	1	1	1	1	0.976721	0.974556
2930	1	1	0.960784	1	1	1	0.99422	1	0.982143	1	0.898936	1	0.978723	1	1	1	1	1	1	1	0.975709	0.97347
2940	1	1	0.960784	1	1	1	0.99422	1	0.982143	1	0.909574	1	0.978723	1	1	1	1	1	1	1	0.977733	0.975646
2950	1	1	0.960784	1	1	1	0.99422	1	0.982143	1	0.909574	1	0.978723	1	1	1	1	1	1	1	0.977733	0.975646
2960	1	1	0.960784	1	1	1	0.99422	1	0.982143	1	0.909574	1	0.978723	1	1	1	1	1	1	1	0.977733	0.975646
2970	1	1	0.960784	1	1	1	0.99422	1	0.982143	1	0.909574	1	0.978723	1	1	1	1	1	1	1	0.977733	0.975646
2980	1	1	0.960784	1	1	1	0.99422	1	0.982143	1	0.909574	1	0.957447	1	1	1	1	1	1	1	0.976721	0.974513
2990	1	1	0.960784	1	1	1	0.99422	1	0.982143	1	0.909574	1	0.978723	1	1	1	1	1	1	1	0.977733	0.975646
3000	1	1	0.960784	1	1	1	0.99422	1	0.982143	1	0.904255	1	0.978723	1	1	1	1	1	1	1	0.976721	0.974555
3010	1	1	0.960784	1	1	1	0.99422	1	0.982143	1	0.904255	1	0.978723	1	1	1	1	1	1	1	0.976721	0.974555
3020	1	1	0.960784	1	1	1	0.99422	1	0.982143	1	0.904255	1	0.978723	1	1	1	1	1	1	1	0.976721	0.974555
3030	1	1	0.960784	1	1	1	0.99422	1	0.982143	1	0.909574	1	0.978723	1	1	1	1	1	1	1	0.977733	0.975648
3040	1	1	0.960784	1	1	1	0.99422	1	0.982143	1	0.904255	1	0.978723	1	1	1	1	1	1	1	0.976721	0.974555
3050	1	1	0.960784	1	1	1	0.99422	1	0.982143	1	0.909574	1	0.978723	1	1	1	1	1	1	1	0.977733	0.975645
3060	1	1	0.960784	1	1	1	0.99422	1	0.982143	1	0.904255	1	0.978723	1	1	1	1	1	1	1	0.976721	0.974556
3070	1	1	0.960784	1	1	1	0.99422	1	0.982143	1	0.904255	1	0.978723	1	1	1	1	1	1	1	0.976721	0.974556
3080	1	1	0.960784	1	1	1	0.99422	1	0.982143	1	0.904255	1	0.978723	1	1	1	1	1	1	1	0.976721	0.974556
3090	1	1	0.960784	1	1	1	0.99422	1	0.982143	1	0.904255	1	0.978723	1	1	1	1	1	1	1	0.976721	0.974556
3100	1	1	0.960784	1	1	1	0.99422	1	0.982143	1	0.904255	1	0.978723	1	1	1	1	1	1	1	0.976721	0.974556
3110	1	1	0.960784	1	1	1	0.99422	1	0.982143	1	0.904255	1	0.978723	1	1	1	1	1	1	1	0.976721	0.974559
3120	1	1	0.960784	1	1	1	0.99422	1	0.982143	1	0.904255	1	0.978723	1	1	1	1	1	1	1	0.976721	0.974559
3130	1	1	0.960784	1	1	1	0.99422	1	0.982143	1	0.909574	1	0.978723	1	1	1	1	1	1	1	0.977733	0.97565
3140	1	1	0.960784	1	1	1	0.99422	1	0.982143	1	0.909574	1	0.978723	1	1	1	1	1	1	1	0.977733	0.97565
3150	1	1	0.960784	1	1	1	0.99422	1	0.982143	1	0.909574	1	0.978723	1	1	1	1	1	1	1	0.977733	0.975648
3160	1	1	0.960784	1	1	1	0.99422	1	0.982143	1	0.909574	1	0.978723	1	1	1	1	1	1	1	0.977733	0.975648
3170	1	1	0.960784	1	1	1	0.99422	1	0.982143	1	0.909574	1	0.978723	1	1	1	1	1	1	1	0.977733	0.975648
3180	1	1	0.960784	1	1	1	0.99422	1	0.982143	1	0.909574	1	0.978723	1	1	1	1	1	1	1	0.977733	0.975648
